CORRECTION

# Correction: A New Soft Computing Method for K-Harmonic Means Clustering

Wei-Chang Yeh, Yunzhi Jiang, Yee-Fen Chen, Zhe Chen

There are errors in the Funding section. The correct funding information is as follows: This research was supported in part by the Ministry of Science and Technology, R.O.C. under grant MOST 104-2221-E-007-061-MY3. The funders had no role in study design, data collection and analysis, decision to publish, or preparation of the manuscript.

## Reference

1. Yeh W-C, Jiang Y, Chen Y-F, Chen Z (2016) A New Soft Computing Method for K-Harmonic Means Clustering. PLoS ONE 11(11): e0164754. doi:[10.1371/journal.pone.0164754](https://doi.org/10.1371/journal.pone.0164754) PMID: [27846228](https://pubmed.ncbi.nlm.nih.gov/27846228/)

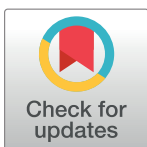

## OPEN ACCESS

**Citation:** Yeh W-C, Jiang Y, Chen Y-F, Chen Z (2017) Correction: A New Soft Computing Method for K-Harmonic Means Clustering. PLoS ONE 12(1): e0169707. doi:[10.1371/journal.pone.0169707](https://doi.org/10.1371/journal.pone.0169707)

**Published:** January 3, 2017

**Copyright:** © 2017 Yeh et al. This is an open access article distributed under the terms of the [Creative Commons Attribution License](https://creativecommons.org/licenses/by/4.0/), which permits unrestricted use, distribution, and reproduction in any medium, provided the original author and source are credited.
